# Supplementary material
Source: Springer Nature journal article supplement (https://www.springermedizin.de/resource/supplementary/13063_2010_540_MOESM1_ESM.pdf/9618822)
Supplement: MOESM1 [file 9618822]

Adults discharged from hospital with COPD as primary/secondary reason for admission

PCT Staff apply eligibility criteria

- Excluded:
- Current/prior participation (n=?)
  - Cognitive impairment (n=?)
  - Lack of landline (n=?)
  - Unwilling to use technology (n=?)
  - Co-morbidities (n=?)
  - >3 admissions in 12 months (n=?)
  - GP identifies pt as unsuitable (n=?)

Invited to participate

Declined participation (n=?)

Randomised (n=60)

SDS (n=30)

T-SDS (n=30)

Postal questionnaire  
6 months after completing SDS/T-SDS service

- Health care resource use
- Quality of life
